# Supplementary material for: Effectiveness of an Unguided Online Intervention for Sexual Pleasure in Women: A Randomized Controlled Pilot Study
Source: MDPI journal article supplement (doi:10.3390/sexes4010012), 2023-02-20
Supplement: s1 [file s1]

**Table S1.** ASPI State Items.

| Item No. | Item (Origin in German)                                                                          | Item (Translated into English)                                                | Origin Subscale             |
|----------|--------------------------------------------------------------------------------------------------|-------------------------------------------------------------------------------|-----------------------------|
| state1   | Sexuelle Erregung zu spüren, war fantastisch.                                                    | Feeling sexually aroused was amazing.                                         | Sensual Pleasure            |
| state2   | Das Berühren meiner erogenen Zonen war lustvoll.                                                 | Touching my erogenous zones was pleasurable.                                  | Sensual Pleasure            |
| state3   | Sexuelle Empfindungen in meinem Körper zu spüren, war lustvoll.                                  | Feeling sexual sensations in my body was pleasurable.                         | Sensual Pleasure            |
| state4   | Beim Partnersex glühten meine Geschlechtsteile vor Erregung.                                     | During partnersex, my genitals glowed with excitement.                        | Sensual Pleasure            |
| state5   | Während der Masturbation glühten meine Geschlechtsteile vor Erregung.                            | During masturbation, my genitals glowed with excitement.                      | Sensual Pleasure            |
| state6   | Ich konnte mein Sexleben so gestalten, dass ich es wirklich genoss.                              | I could shape my sexlife in a way that I really enjoyed.                      | Pleasure-Related Mastery    |
| state7   | Beim Partnersex konnte ich bekommen, was ich brauchte, um zu genießen.                           | During partnersex, I was able to get what I needed to enjoy myself.           | Pleasure-Related Mastery    |
| state8   | Während der Masturbation konnte ich mir geben, was ich brauchte, um zu genießen.                 | During masturbation, I was able to give myself what I needed to enjoy myself. | Pleasure-Related Mastery    |
| state9   | Beim Partnersex hatte ich das Gefühl, dass ich gut im Bett war.                                  | During partnersex, I felt 'good at sex'.                                      | Pleasure-Related Mastery    |
| state10  | Während der Masturbation war ich gut darin, mich zu befriedigen.                                 | During masturbation, I was good at pleasuring myself.                         | Pleasure-Related Mastery    |
| state11  | Beim Sex hatte ich das Gefühl, dass ich meine*n Sexualpartner*in genießen lassen konnte.         | During sex, I had the feeling that I was able to pleasure my sexpartner.      | Pleasure-Related Mastery    |
| state12  | Ich legte Wert darauf, meine sexuellen Bedürfnisse auszuleben                                    | I thought it was important to live out my sexual needs.                       | Pleasure-Related Validation |
| state13  | Beim Partnersex vernachlässigte ich mein eigenes Vergnügen.                                      | During partnersex, I neglected my own pleasure.                               | Pleasure-Related Validation |
| state14  | Beim Partnersex war mein sexuelles Vergnügen unbedeutend.                                        | During partnersex, my own sexual pleasure did not feature.                    | Pleasure-Related Validation |
| state15  | Meine*n Sexualpartner*in zu verführen, war lustvoll.                                             | Seducing my sexpartner was pleasurable.                                       | Interaction Pleasure        |
| state16  | Meine*n Sexualpartner*in zu stimulieren, war lustvoll.                                           | Stimulating my sexpartner was pleasurable.                                    | Interaction Pleasure        |
| state17  | Durch meine*n Sexualpartner*in stimuliert zu werden, war lustvoll.                               | Being stimulated by my sexpartner was pleasurable.                            | Interaction Pleasure        |
| state18  | Beim Partnersex waren wir beide völlig in Genuss versunken.                                      | During partnersex, we were both completely absorbed in pleasure.              | Interaction Pleasure        |
| state19  | Beim Partnersex versetzen wir uns gegenseitig in Ekstase.                                        | During partnersex, we whipped each other into ecstasy.                        | Interaction Pleasure        |
| state20  | Das Spüren der Nähe meines Sexualpartners bzw. meiner Sexualpartnerin beim Sex, war fantastisch. | Feeling the closeness of my sexpartner during sex was pleasurable.            | Bonding Pleasure            |
| state21  | Beim Sex fühlte ich mich mit meinem*meiner Sexualpartner*in verbunden.                           | During sex, I felt connected to my sexpartner.                                | Bonding Pleasure            |

|         |                                                                                                    |                                                                            |                         |
|---------|----------------------------------------------------------------------------------------------------|----------------------------------------------------------------------------|-------------------------|
| state22 | Das Spüren von Zuneigung zwischen mir und meinem*meiner Sexualpartner*in beim Sex war fantastisch. | Feeling affection between me and my sexpartner during sex was pleasurable. | Bonding Pleasure        |
| state23 | Mich beim Partnersex geborgen zu fühlen, war fantastisch.                                          | The feeling of security during partnersex was pleasurable.                 | Bonding Pleasure        |
| state24 | Sex brachte mich meinem*meiner Sexualpartner*in näher.                                             | Sex brought me closer to my sexpartner.                                    | Bonding Pleasure        |
| state25 | Meine sexuellen Erfahrungen waren lustvoll.                                                        | My sexual experiences were pleasurable.                                    | General Sexual Pleasure |
| state26 | Partnersex war lustvoll.                                                                           | Partnersex was pleasurable.                                                | General Sexual Pleasure |
| state27 | Über Sex zu fantasieren, war lustvoll.                                                             | Fantasizing about sex was pleasurable.                                     | General Sexual Pleasure |
| state28 | Masturbation war lustvoll.                                                                         | Masturbation was pleasurable.                                              | General Sexual Pleasure |
| state29 | Nach dem Partnersex fühlte ich mich grossartig                                                     | After partnersex I felt amazing.                                           | General Sexual Pleasure |
| state30 | Nach der Masturbation fühlte ich mich grossartig.                                                  | After masturbation I felt amazing.                                         | General Sexual Pleasure |

---
